# Supplementary material for: Contemplative Training and Psychological Stress: an Analysis of First-person Accounts
Source: Springer Nature journal article supplement (doi:10.1007/s12671-021-01661-1), 2021-06-05
Supplement: MOESM1 [file 19231666]

**Supplementary Materials**

**Semi-structured interview questions (administered after the TSST)**

Thank you again for participating in our study. If it is ok with you, I’d like to talk about the task you’ve just went through.

1. Could you please describe in detail your experience starting from the moment you were explained what to do, throughout the task and after it.
2. Was the situation stressful?
   1. Why was it stressful for you?
   2. What is so stressful about this task?
3. Have you tried anything to help you with the stress?
4. What did you pay attention to during the task?
